# Supplementary figures and images for: Histone deacetylase 4 protects from denervation and skeletal muscle atrophy in a murine model of amyotrophic lateral sclerosis
Source: PubMed Central journal article supplement — eBioMedicine. 2019 Feb 1;40:717–32. doi: 10.1016/j.ebiom.2019.01.038 (PMC6414308; doi:10.1016/j.ebiom.2019.01.038), 2019-02-01

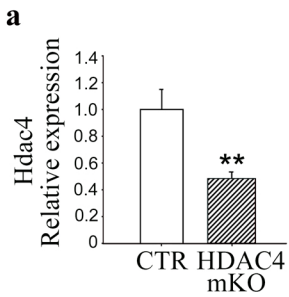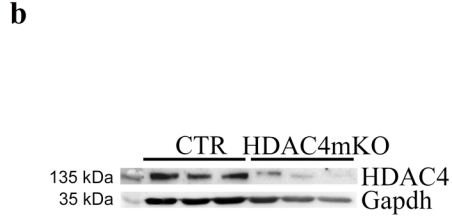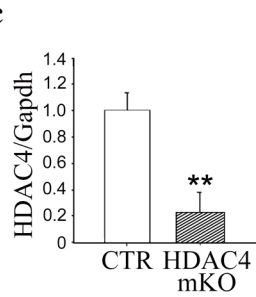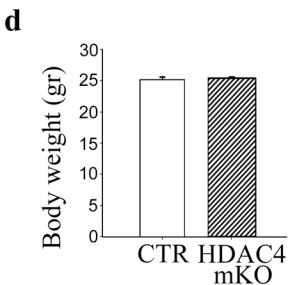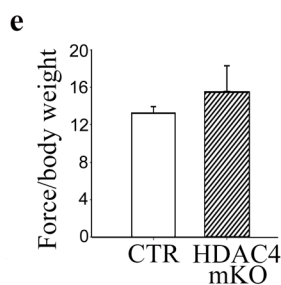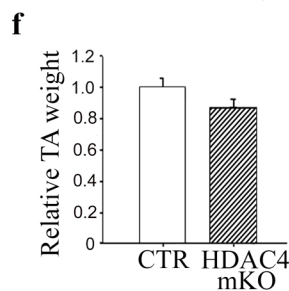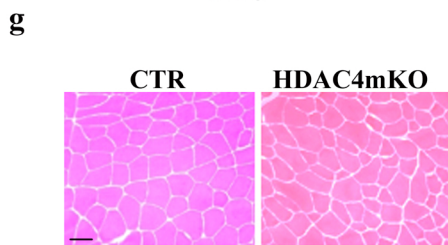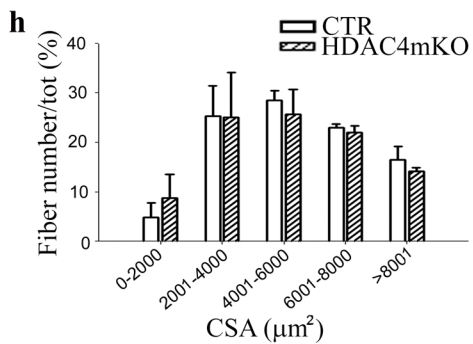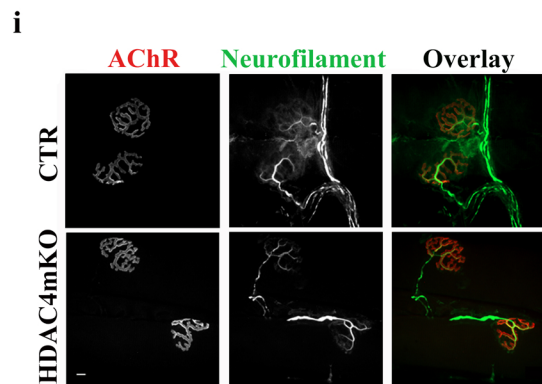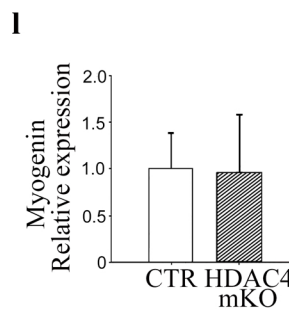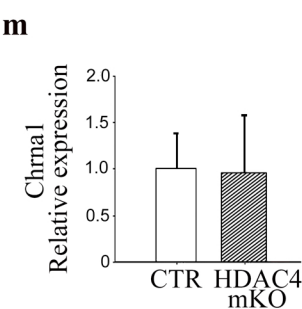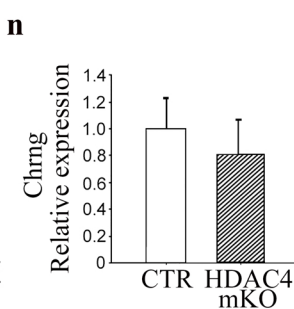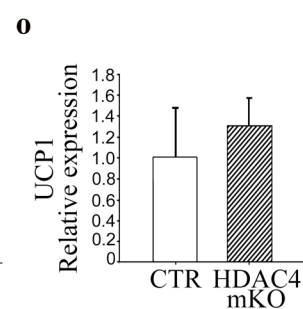

Supplement: mmc1.pdf [file mmc1.pdf]

**a**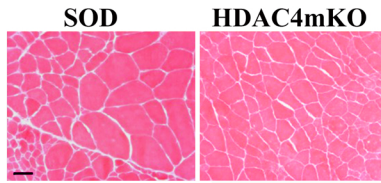**b**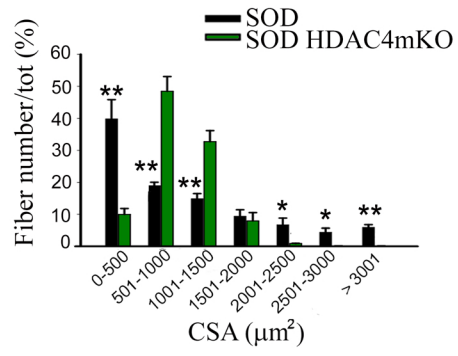

Supplement: mmc2.pdf [file mmc2.pdf]

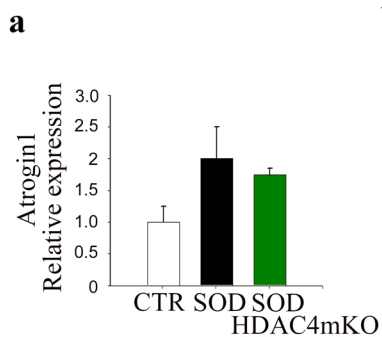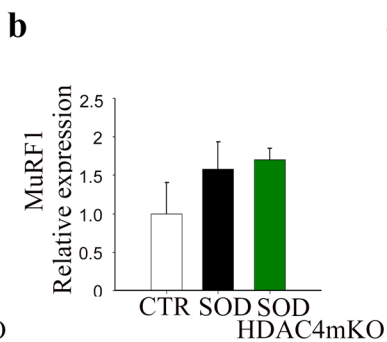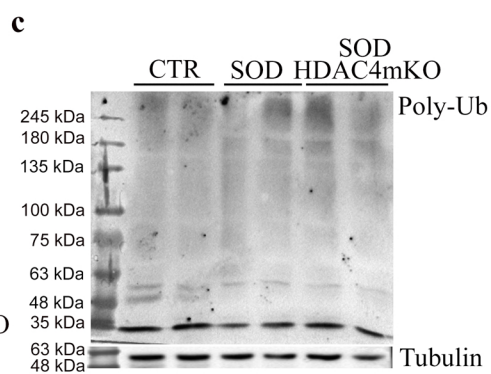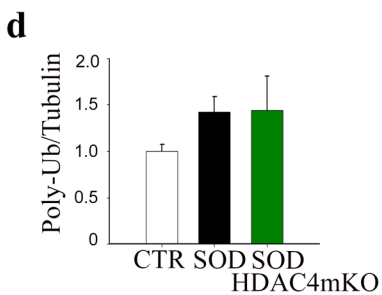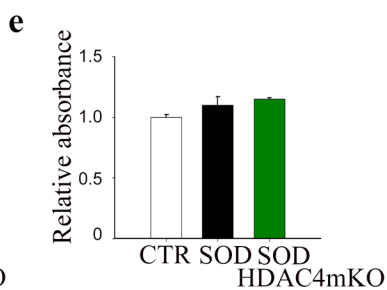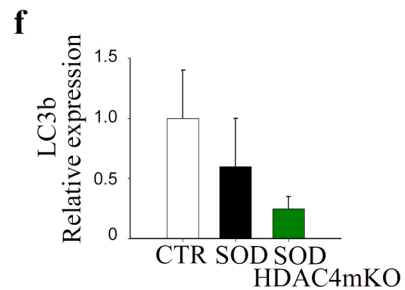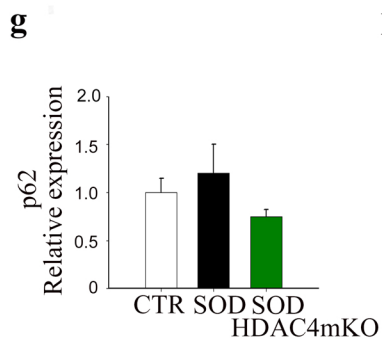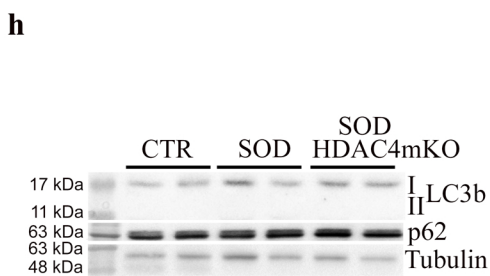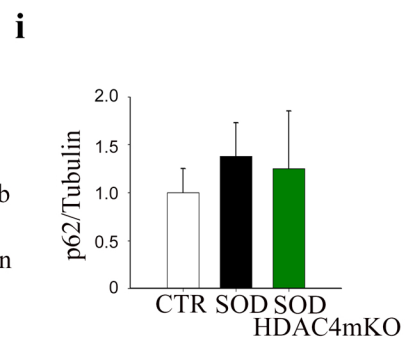

Supplement: mmc3.pdf [file mmc3.pdf]
